# Supplementary material
Source: publisher figshare collection journal article supplement (https://acs.figshare.com/ndownloader/files/3593622)
Supplement: Supplementary file 1 [file 3593622]

# Supporting information for “A new route to non-destructive top-contacts for molecular electronics on Si: Pb evaporated on organic monolayers”

Robert Lovrincic, Olga Kraynis, Rotem Har-Lavan, Abd-Elrazek Haj-Yahya, Wenjie Li, Ayelet Vilan, and David Cahen

Department of Materials and Interfaces, Weizmann Institute of Science, Rehovot 76100, Israel

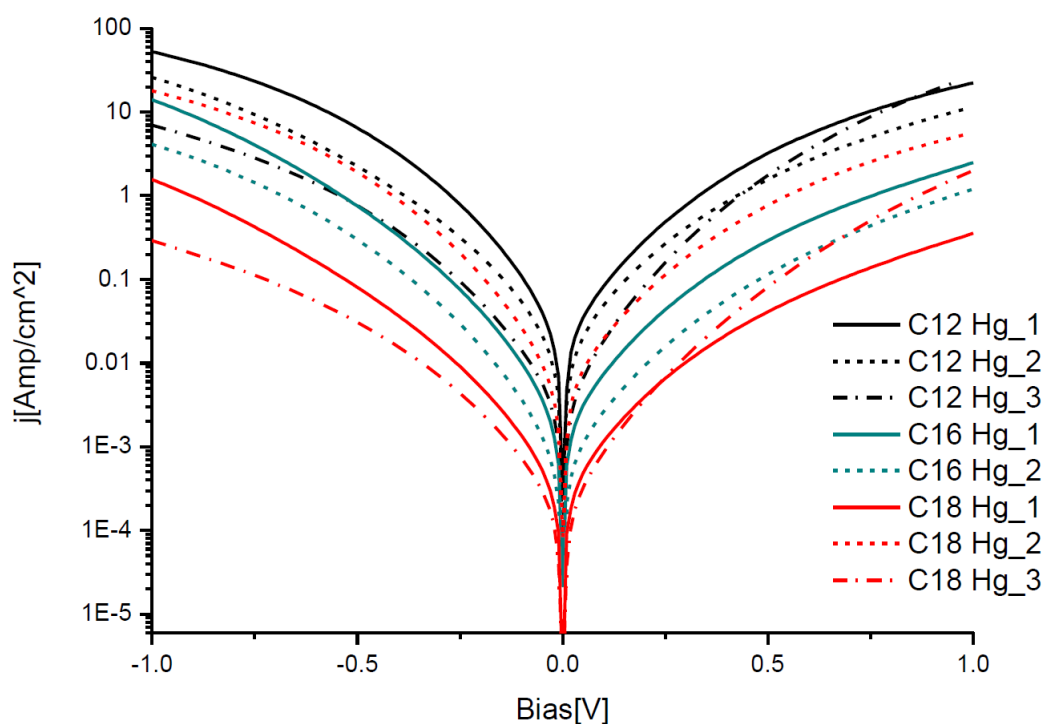

*SI:  $J(V)$  curves for all measured alkyl-chain samples on highly-doped  $n$ -Si(100) with Hg as contact. A length dependence is observed for all samples except C18 Hg\_2.*

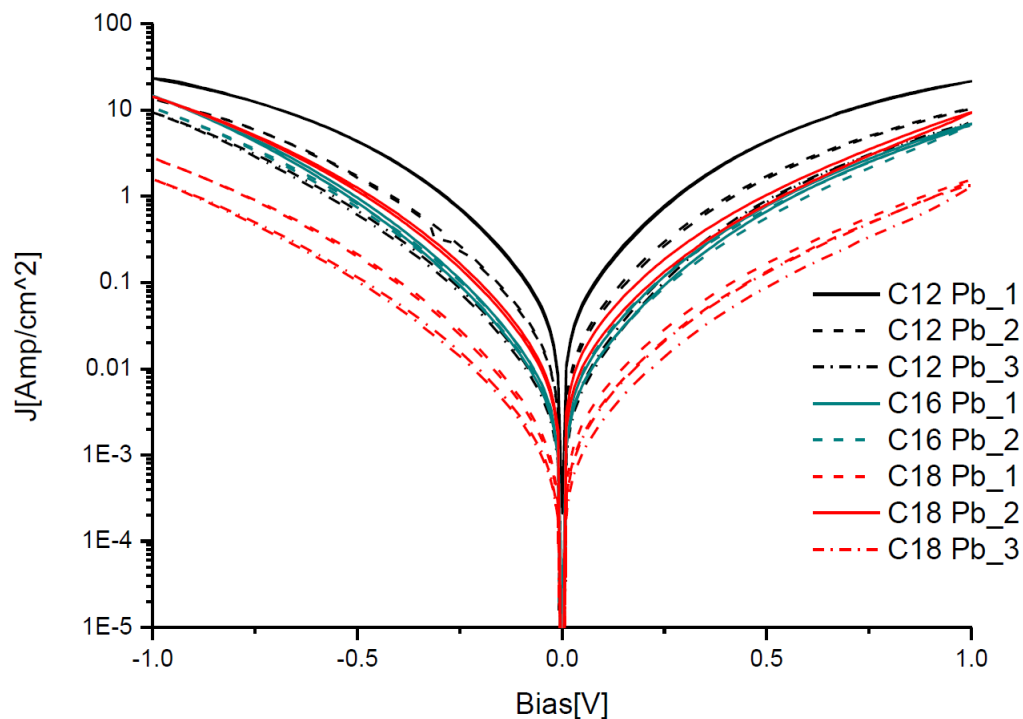

S2:  $J(V)$  curves for the same samples as in Fig. S1, now measured with Pb contacts. As with Hg, sample C18 Pb\_2 deviates from the length dependence observed for all other samples.

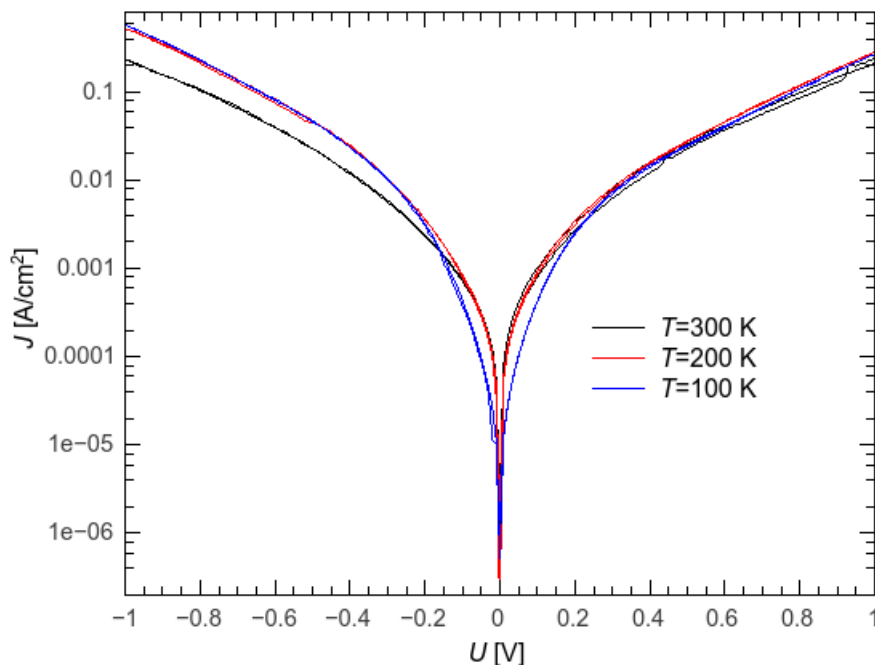

S3:  $J(V)$  measurements of a C16 ML on highly-doped n-Si(100) with Pb contacts at  $T=100\text{K}$ ,  $200\text{K}$ , and  $300\text{K}$ .  $J$  is fairly constant over this broad temperature range.

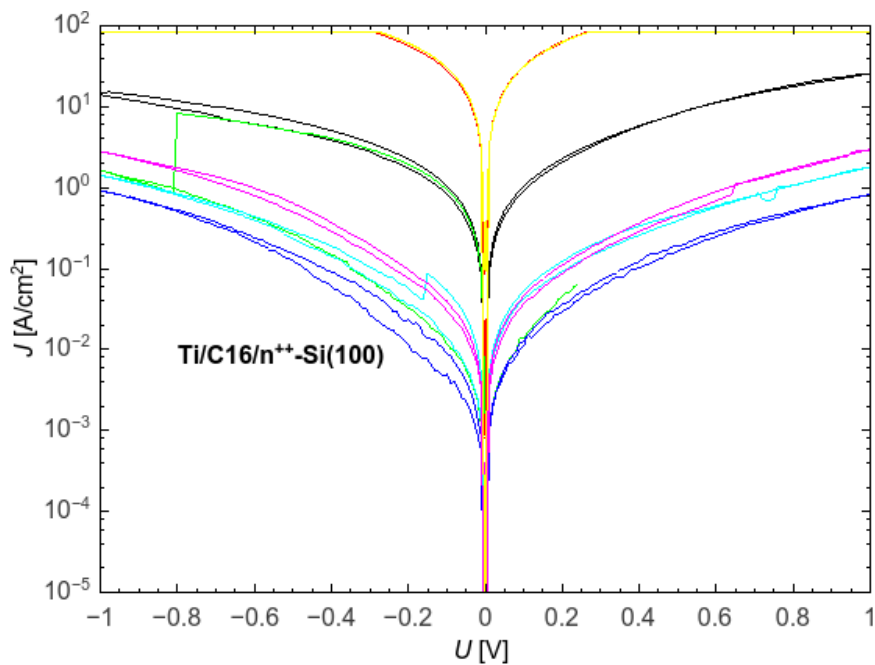

S4:  $J(V)$  measurements of a C16 ML on highly-doped  $n$ -Si(100) with Ti contacts. The currents vary by several orders of magnitude from contact pad to contact pad on the same sample. Such a variation has never been observed for Pb or Hg.

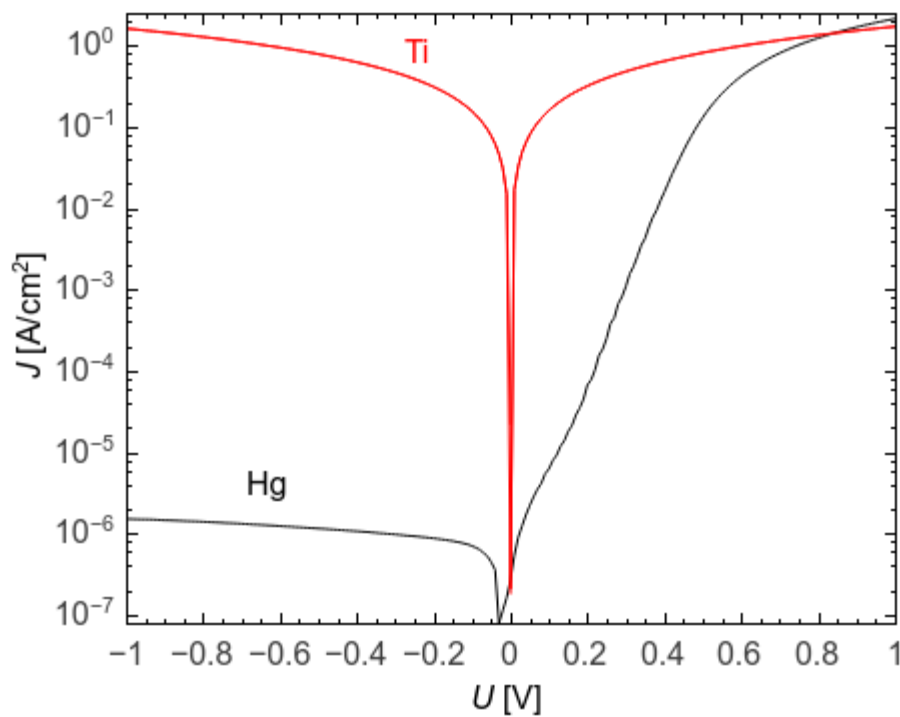

S5:  $J(V)$  measurement of a methyl-styrene ML on  $n$ -Si(111) with Hg and Ti contacts. The measurements were performed on the same sample after the Ti deposition.
